# Supplementary material for: Sulfonic acid functionalized dendrimer-grafted cellulose as a solid acid catalyst for the high-yield and green production of 5-hydroxymethylfurfural
Source: Royal Society of Chemistry journal article supplement (doi:10.1039/d2se00235c), 2022-01-01
Supplement: d2se00235c1.pdf [file d2se00235c1.pdf]

## Supplementary Information

### **Sulfonic acid functionalized dendrimer-grafted cellulose as solid acid catalyst for high-yield and green production of 5-hydroxymethylfurfural**

Mahsa Niakan,<sup>a</sup> Majid Masteri-Farahani,<sup>\*a</sup> Sabah Karimi<sup>b</sup> and Hemayat Shekaari<sup>b</sup>

<sup>a</sup> Faculty of Chemistry, Kharazmi University, Tehran, Iran

<sup>b</sup> Department of Physical Chemistry, Faculty of Chemistry, University of Tabriz, Tabriz, Iran

Email: mfarahani@khu.ac.ir

## 1. Chemicals and instrumentation

All reagents and solvents were obtained from Sigma-Aldrich and Merck companies and used without further purification.

Elemental analyses were performed by using a 2400 CHNS Series Perkin Elmer analyzer. Fourier transformed infrared (FTIR) spectroscopy data were recorded at room temperature using a Shimadzu FT-IR-8300 spectrophotometer. Scanning electron microscopy (SEM) images were performed using a TESCAN microscope (Model: MIRA3) equipped with energy-dispersive X-ray (EDX) spectroscopy. X-ray photoelectron spectroscopy (XPS) data was obtained using an ESCALAB 250 XI model X-ray photoelectron spectrometer (Thermo Scientific), with Mg X-ray source. X-ray diffraction (XRD) patterns of the samples were measured with a Philips TW-1730 equipped with a Cu-K $\alpha$  source. Transmission electron microscopic (TEM) images of the samples were taken by using a Zeiss-FM10C electron microscope operating at 200 kV. The experimental process was monitored by thin layer chromatography (TLC) on silica gel polygrams SIL G/UV 254 plates. High-performance liquid chromatography (HPLC) analysis of 5-HMF was recorded on a HPLC instrument (Agilent Technology Model: 1260 equipped with a UV-vis detector connected to eclipse XDB-C18), in which the mobile phase was a methanol:water (2:8) mixture with a flow rate of 1 mL min<sup>-1</sup> and the column and UV-vis detector temperatures were maintained at 30 °C and 35 °C, respectively. <sup>1</sup>H and <sup>13</sup>C NMR spectra were recorded by using a Bruker Avance 400 MHz spectrometer (<sup>1</sup>H using tetramethylsilane (TMS) as an internal reference and CDCl<sub>3</sub> as deuterated solvent).

## **2. Synthesis of Cell-G1.5**

A mixture of Cell-G1 (1 g), 1,3,5-triacryloylhexahydro-1,3,5-triazine (10 mmol, 2.5 g), and AIBN (10 mmol, 1.64 g) in DMF (30 mL) was stirred at 100 °C for 24 h under N<sub>2</sub> atmosphere. The obtained product (Cell-G1.5) was isolated by filtration, washed repeatedly through soxhlet extraction with methanol, and dried under vacuum.

## **3. Synthesis of Cell-G2**

1,2-ethanedithiol (20 mmol, 1.68 mL) and AIBN (20 mmol, 3.28 g) were added to a suspension of Cell-G1.5 (1 g) in 30 mL of DMF and the mixture was stirred at 100 °C for 24 h under N<sub>2</sub> atmosphere. The solid was separated by filtration and washed with hot ethanol. Cell-G2 was finally obtained by vacuum drying.

## **4. Synthesis of Cell-G2.5**

Cell-G2 (1 g) was added into a mixture containing dimethylformamide (DMF, 30 mL), 1,3,5-triacryloylhexahydro-1,3,5-triazine (20 mmol, 5 g), and azobisisobutyronitrile (AIBN) as initiator (20 mmol, 3.28 g). The obtained mixture was stirred at 100 °C for 24 h under N<sub>2</sub> atmosphere. The end-product (Cell-G2.5) was separated by filtration, washed with hot methanol in a continuous extraction apparatus (Soxhlet), and dried under vacuum.

## **5. Synthesis of Cell-G3**

To a suspension of Cell-G2.5 (1 g) in DMF (30 mL), 1,2-ethanedithiol (40 mmol, 3.36 mL) followed by AIBN (40 mmol, 6.56 g) was added and stirred at 100 °C for 24 h under N<sub>2</sub> atmosphere. The solid material (Cell-G3) was isolated by filtration, washed with ethanol, and dried under vacuum.

## 6. XPS analysis

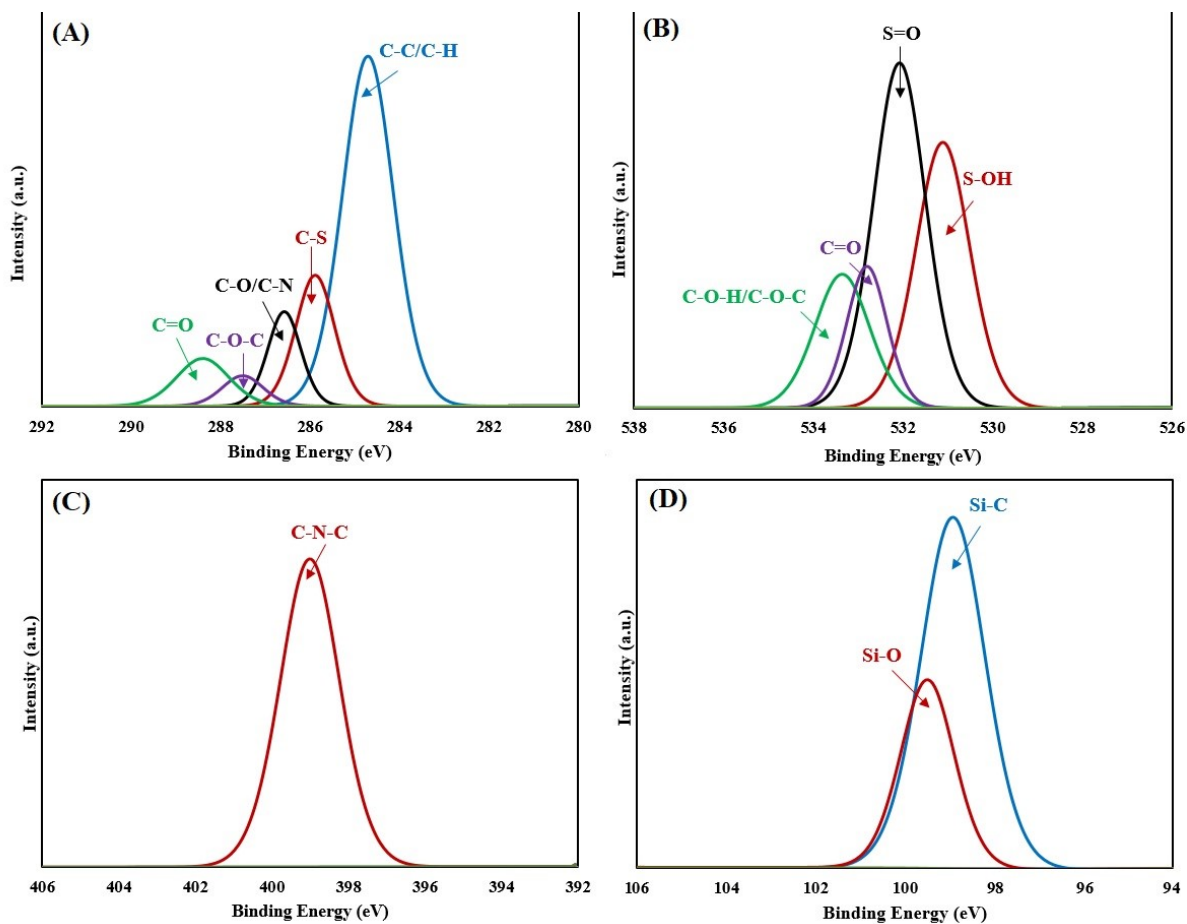

**Fig. S1.** High resolution XPS spectra of (A) C 1s, (B) O 1s, (C) N 1s, and (D) Si 2p of Cell-G3-SO<sub>3</sub>H.

**Table S1.** Atomic percentage of various elements from XPS for Cell-G3-SO<sub>3</sub>H.

| Sample                    | C (%) | O (%) | N (%) | S (%) | Si (%) |
|---------------------------|-------|-------|-------|-------|--------|
| Cell-G3-SO <sub>3</sub> H | 53.42 | 27.16 | 10.16 | 7.65  | 1.61   |

**7. Calculation of the green chemistry metrics for the fructose dehydration to 5-HMF over Cell-G3-SO<sub>3</sub>H in acetone:water (v:v=2:1)**

**Table S2.** Calculation of the green chemistry metrics.

|   |                                                                                          |                                                                                                                                                                                                              |
|---|------------------------------------------------------------------------------------------|--------------------------------------------------------------------------------------------------------------------------------------------------------------------------------------------------------------|
| 1 | <b>Atom economy</b>                                                                      |                                                                                                                                                                                                              |
|   | Atom Economy = (Exact molecular mass of 5-HMF / Exact Molecular mass of fructose) × 100% | = 126.11/180.16 × 100%<br>AE = <b>70%</b>                                                                                                                                                                    |
| 2 | <b>Reaction mass efficiency</b>                                                          |                                                                                                                                                                                                              |
|   | Reaction Mass Efficiency = (Mass of 5-HMF / Mass of fructose) × 100                      | = (60/90) × 100<br>RME = <b>66.67%</b>                                                                                                                                                                       |
| 3 | <b>E-factor</b>                                                                          |                                                                                                                                                                                                              |
|   | E-Factor = Amount of waste/ Amount of product                                            | Total amount of reactant = 90 mg<br>Amount of final product = 60 mg<br>Amount of waste = (Total amount of reactant – amount of final product)<br>= (90-60) mg<br>= 30 mg<br>E-factor = (30 /60) = <b>0.5</b> |
| 4 | <b>Eco-scale</b>                                                                         |                                                                                                                                                                                                              |
|   | Eco-scale = (100 – Sum of individual penalties)                                          | Eco-scale = 100–15<br>= <b>85</b>                                                                                                                                                                            |

**Table S3.** Calculation of the penalty points for the Eco-scale calculation.

| <b>Calculation of penalty points</b> |                                                                           |                |
|--------------------------------------|---------------------------------------------------------------------------|----------------|
|                                      | Parameters                                                                | Penalty points |
| 1                                    | <b>Reaction Yield</b>                                                     |                |
|                                      | Yield = 96%                                                               | 2              |
| 2                                    | <b>Price of reaction components (to obtain 0.4 mmol of final product)</b> |                |
|                                      | Catalyst components                                                       | 3              |

|   |                                            |           |
|---|--------------------------------------------|-----------|
| 3 | <b>Safety</b>                              |           |
|   | Ethyl acetate, Catalyst components (Toxic) | 5         |
| 4 | <b>Technical setup</b>                     |           |
|   | Common setup                               | 0         |
| 5 | <b>Temperature/Time</b>                    |           |
|   | Heating, < 1 h                             | 2         |
| 6 | <b>Work and Purification</b>               |           |
|   | Liquid-liquid extraction                   | 3         |
|   | Total penalty points                       | <b>15</b> |

## 8. Proposed mechanism for the conversion of glucose to 5-HMF

### Step 1: Isomerization of Glucose to Fructose

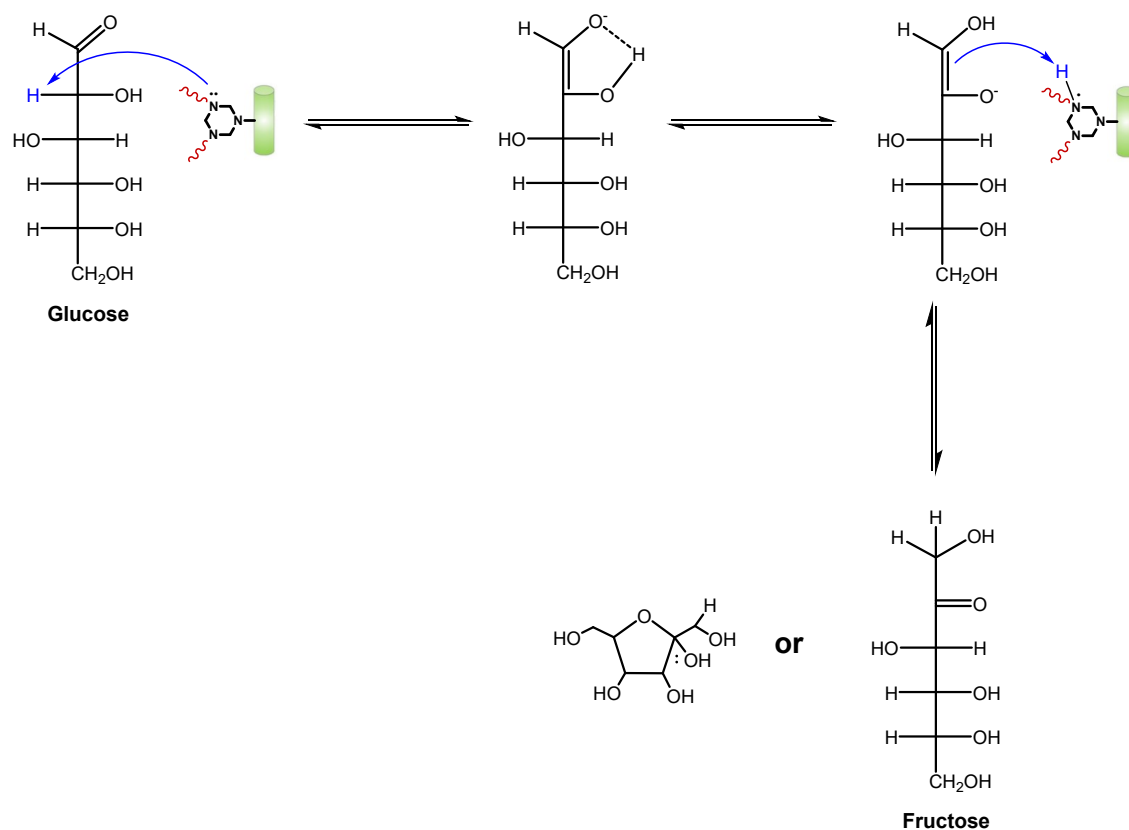

### Step 2: Dehydration of Fructose to 5-HMF

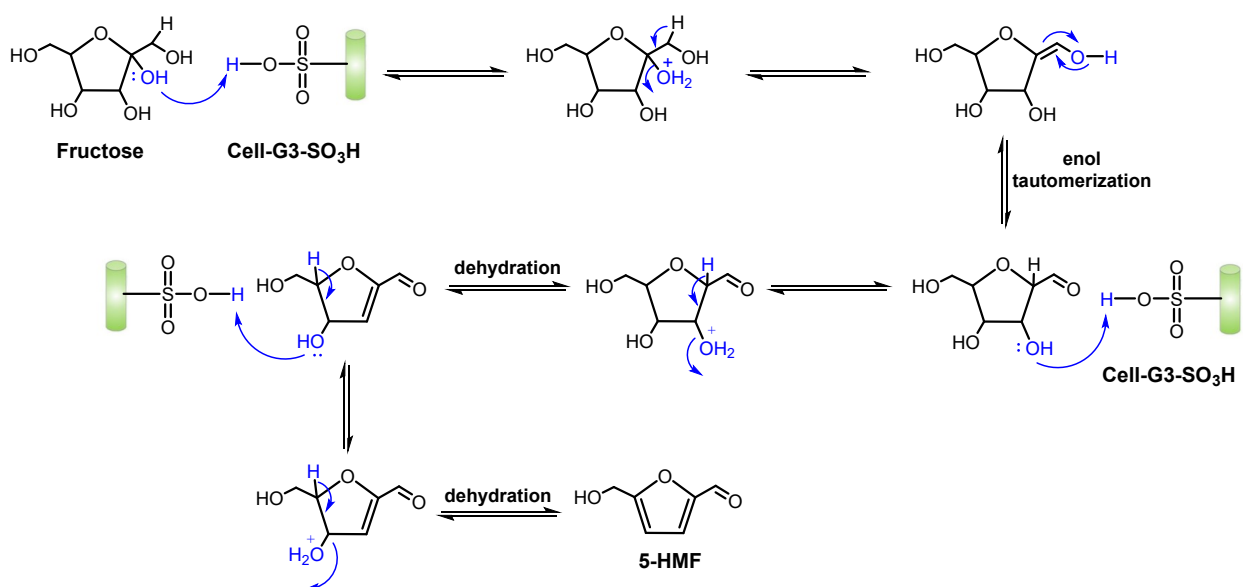

Fig. S2. Proposed mechanism for the conversion of glucose to 5-HMF catalyzed by Cell-G3-SO<sub>3</sub>H.

## 9. Characterization of 5-HMF

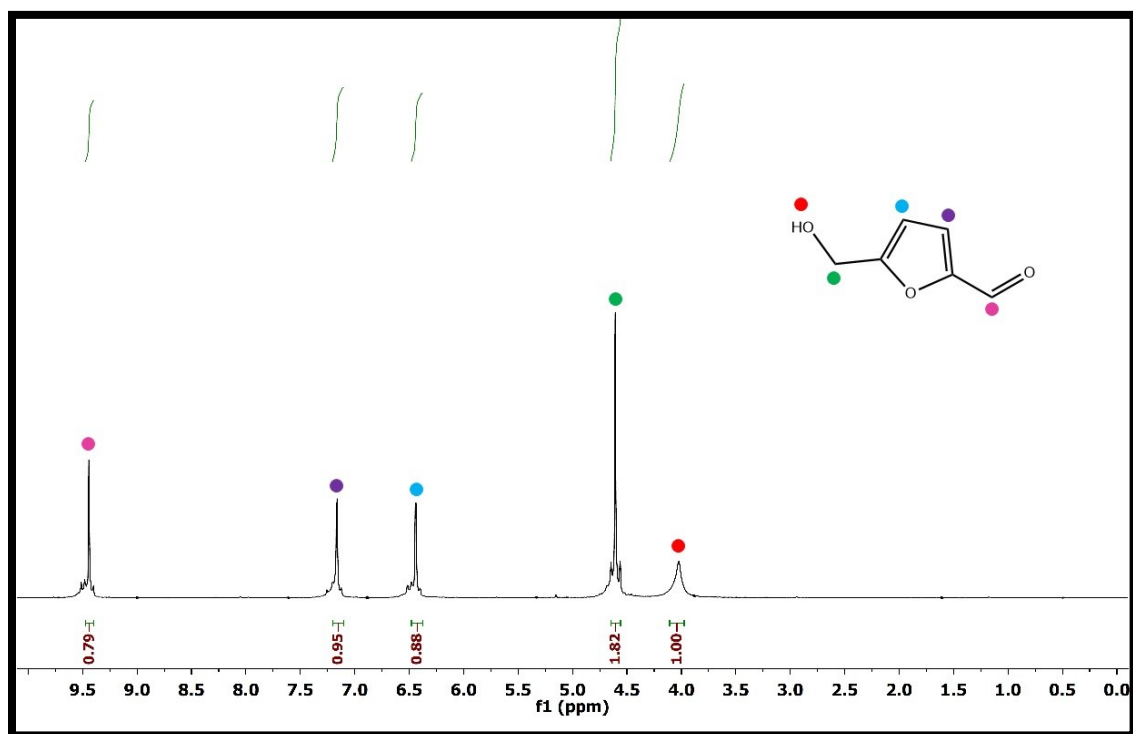

Fig. S3. <sup>1</sup>H NMR spectrum of the isolated 5-HMF in CDCl<sub>3</sub>.

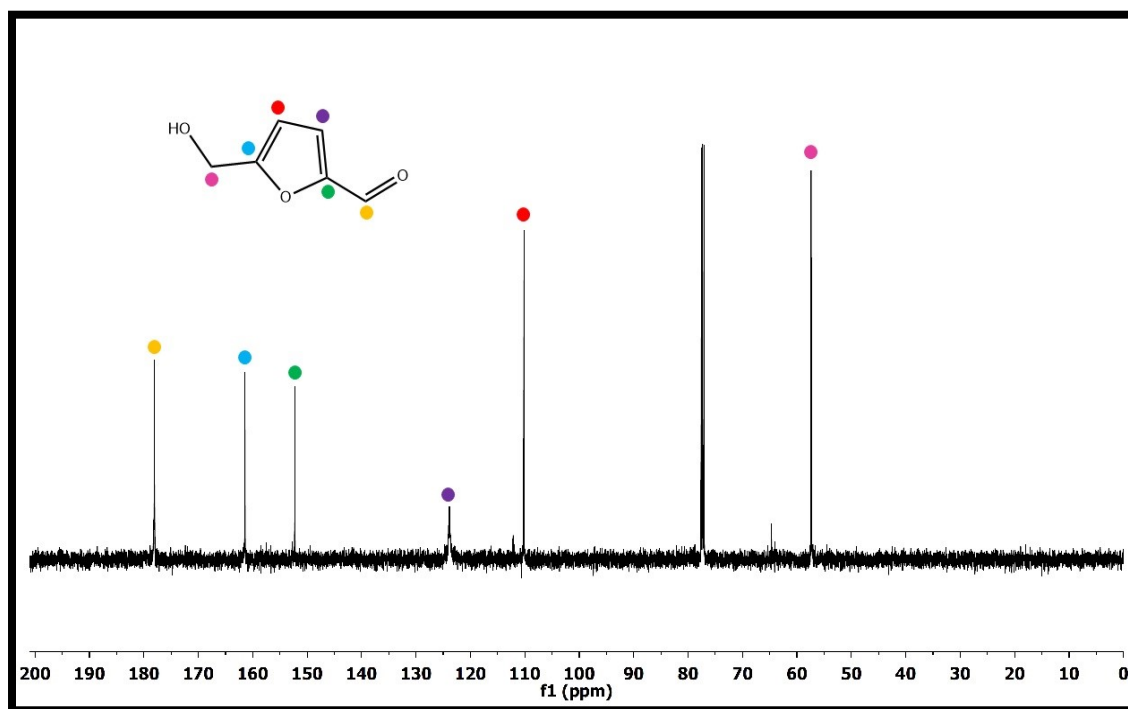

Fig. S4. <sup>13</sup>C NMR spectrum of the isolated 5-HMF in CDCl<sub>3</sub>.



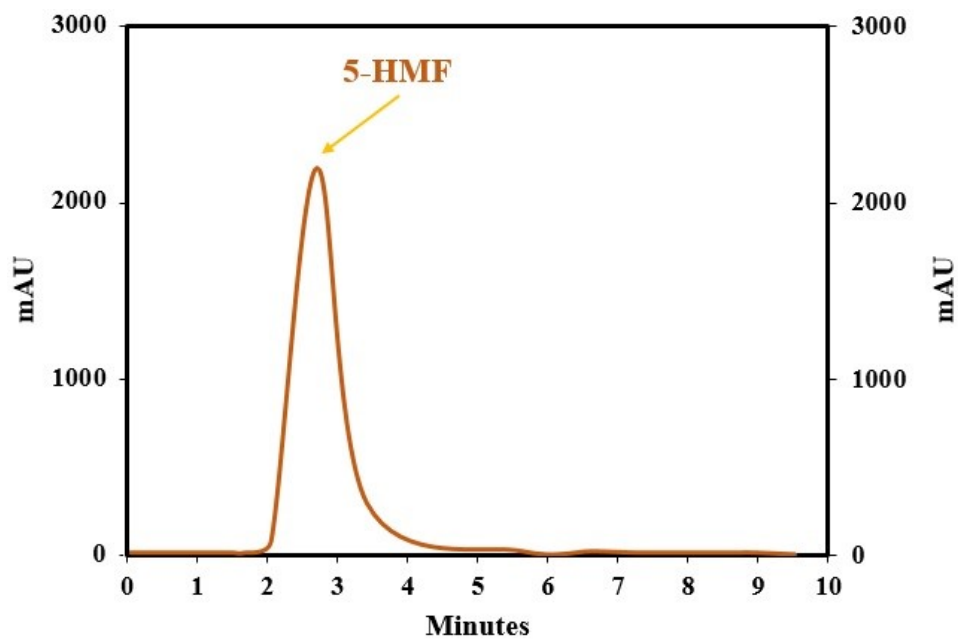

Fig. S5. HPLC analysis result of the isolated 5-HMF.

### 10. Characterization of the recovered catalyst

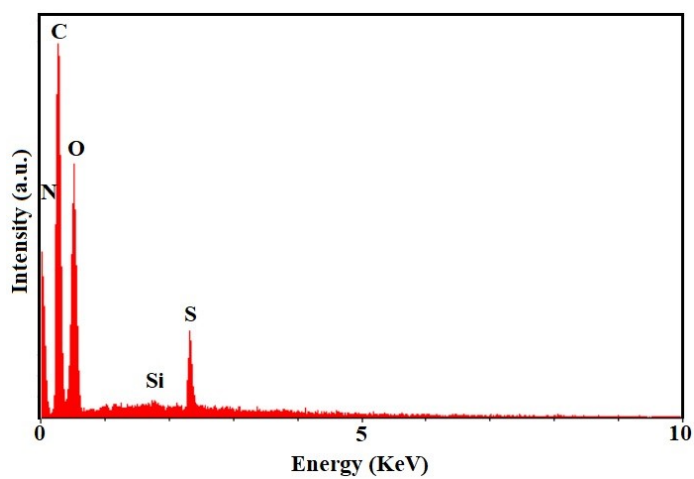

Fig S6. EDX spectrum of the reused catalyst after five runs.

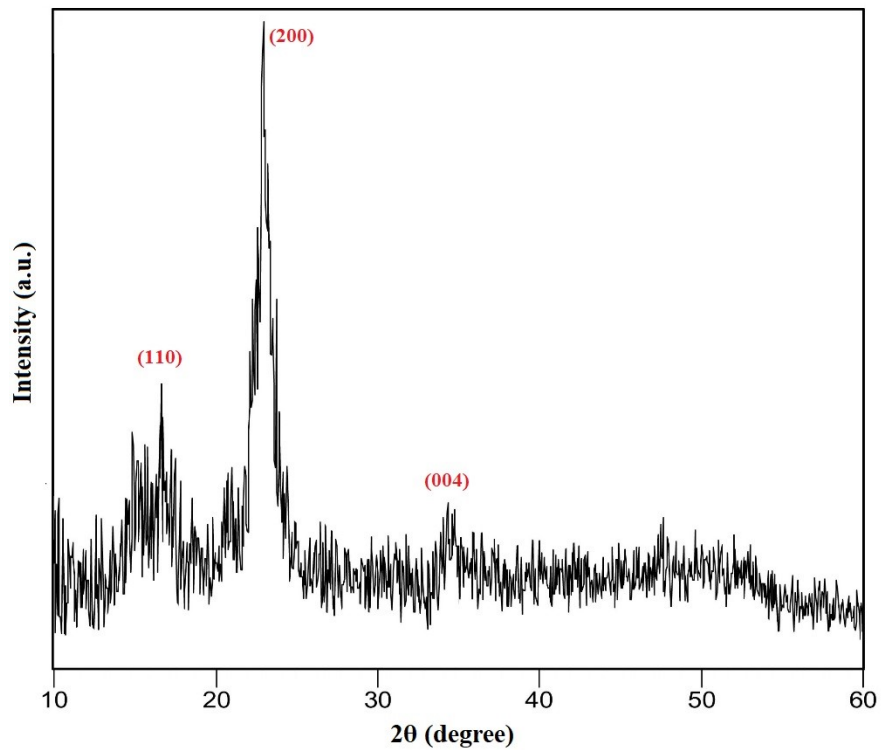

**Fig. S7.** XRD pattern of the reused catalyst after five runs.
